# Supplementary material
Source: publisher figshare collection journal article supplement (https://sage.figshare.com/ndownloader/files/23804919)
Supplement: Supplementary file 1 [file 23804919]

**Supplemental material.** The logic grid of relevant keywords used within PubMed

| Acceptance and commitment therapy | Family caregivers |
| --- | --- |
| "acceptance and commitment therapy"[tiab]  OR  "acceptance and commitment therapy"[MeSH] | "caregiver*"[tiab]  OR  "carer*"[tiab]  OR  "family member*"[tiab]  OR  "relative*"[tiab]  OR  "family"[tiab]  OR  "families"[tiab]  OR  "parent*"[tiab]  OR  "mother*"[tiab]  OR  "father*"[tiab]  OR  "caregivers"[MeSH] |
